# Supplementary material
Source: Elsevier journal article supplement (https://www.sciencedirect.com/science/article/pii/S0213911122000255)
Supplement: mmc1 [file S0213911122000255:mmc1.pdf]

**Supplementary table 1. Predicted mean values of evaluated mental health scores for main predictor.** Four regression models were implemented, one for emotional eating behavior, one for depression, one for sleep quality and one for sense of coherence. Models were adjusted by residential zone (urban/rural), consumption of sleeping pills (yes/no), living with a partner (yes/no), occupation (student/employee/unemployed), times of leaving home per week (never/1-2/3 or more). For numerical predictors mean values are showed for 1<sup>st</sup> and 3<sup>rd</sup> quantiles. Model information is depicted in the last column. Abbreviations: LCI, lower confidence interval; UCI, upper confidence interval; LR, likelihood ratio test.

|                                    |                                             |       | Mean  | LCI   | UCI   | Model information                                                             |
|------------------------------------|---------------------------------------------|-------|-------|-------|-------|-------------------------------------------------------------------------------|
| <b>Emotional eating behavior</b>   | <i>Mobility to workplaces</i>               | - 47  | 8.37  | 8.19  | 8.85  | LR Chi <sup>2</sup> : 422.31; df 14, <i>p</i> < 0.000. R <sup>2</sup> : 0.049 |
|                                    |                                             | - 34  | 7.87  | 7.61  | 8.34  |                                                                               |
|                                    | <i>Mobility to groceries and pharmacies</i> | - 29  | 8.41  | 8.20  | 8.92  |                                                                               |
|                                    |                                             | - 23  | 8.23  | 8.07  | 8.70  |                                                                               |
|                                    | <i>Gender</i>                               | Woman | 8.29  | 8.13  | 8.76  |                                                                               |
|                                    |                                             | Man   | 6.47  | 6.27  | 6.94  |                                                                               |
|                                    | <i>Age (years)</i>                          | 19    | 8.07  | 7.66  | 8.76  |                                                                               |
|                                    |                                             | 25    | 7.78  | 7.62  | 8.37  |                                                                               |
|                                    | <i>Mobility to workplaces</i>               | - 47  | 5.39  | 5.10  | 6.26  |                                                                               |
|                                    |                                             | - 34  | 4.66  | 4.21  | 5.29  |                                                                               |
| <b>Depression (PHQ-9)</b>          | <i>Mobility to groceries and pharmacies</i> | - 29  | 5.51  | 5.19  | 6.48  | LR Chi <sup>2</sup> : 671.24; df 14, <i>p</i> < 0.000. R <sup>2</sup> : 0.077 |
|                                    |                                             | - 23  | 5.16  | 4.90  | 5.91  |                                                                               |
|                                    | <i>Gender</i>                               | Woman | 5.28  | 5.98  | 6.11  |                                                                               |
|                                    |                                             | Man   | 4.23  | 3.94  | 5.02  |                                                                               |
|                                    | <i>Age (years)</i>                          | 19    | 5.15  | 4.83  | 5.57  |                                                                               |
|                                    |                                             | 25    | 4.75  | 4.46  | 5.16  |                                                                               |
|                                    | <i>Mobility to workplaces</i>               | - 47  | 5.15  | 4.96  | 5.51  |                                                                               |
|                                    |                                             | - 34  | 4.60  | 4.37  | 4.78  |                                                                               |
|                                    | <i>Mobility to groceries and pharmacies</i> | - 29  | 5.24  | 5.04  | 5.63  |                                                                               |
|                                    |                                             | - 23  | 4.99  | 4.80  | 5.26  |                                                                               |
| <b>Sleep quality (PSQI)</b>        | <i>Gender</i>                               | Woman | 5.07  | 4.88  | 5.38  | LR Chi <sup>2</sup> : 686.83; df 14, <i>p</i> < 0.000. R <sup>2</sup> : 0.078 |
|                                    |                                             | Man   | 4.81  | 4.65  | 5.25  |                                                                               |
|                                    | <i>Age (years)</i>                          | 19    | 4.82  | 4.48  | 4.92  |                                                                               |
|                                    |                                             | 25    | 4.87  | 4.70  | 5.16  |                                                                               |
|                                    | <i>Mobility to workplaces</i>               | - 47  | 59.06 | 58.08 | 59.43 |                                                                               |
|                                    |                                             | - 34  | 59.70 | 58.90 | 60.49 |                                                                               |
| <b>Sense of coherence (SOC-15)</b> | <i>Mobility to groceries and pharmacies</i> | - 29  | 58.96 | 57.86 | 59.42 | LR Chi <sup>2</sup> : 565.09; df 14, <i>p</i> < 0.000. R <sup>2</sup> : 0.065 |

|    |                    |       |       |       |       |
|----|--------------------|-------|-------|-------|-------|
|    |                    | - 23  | 59.26 | 58.43 | 59.67 |
|    |                    |       |       |       |       |
| 1  | <i>Gender</i>      | Woman | 59.16 | 58.23 | 59.55 |
| 2  |                    | Man   | 59.71 | 59.11 | 61.00 |
| 3  |                    |       |       |       |       |
| 4  |                    |       |       |       |       |
| 5  | <i>Age (years)</i> | 19    | 58.75 | 58.23 | 59.17 |
| 6  |                    | 25    | 61.07 | 59.82 | 61.46 |
| 7  |                    |       |       |       |       |
| 8  |                    |       |       |       |       |
| 9  |                    |       |       |       |       |
| 10 |                    |       |       |       |       |
| 11 |                    |       |       |       |       |
| 12 |                    |       |       |       |       |
| 13 |                    |       |       |       |       |
| 14 |                    |       |       |       |       |
| 15 |                    |       |       |       |       |
| 16 |                    |       |       |       |       |
| 17 |                    |       |       |       |       |
| 18 |                    |       |       |       |       |
| 19 |                    |       |       |       |       |
| 20 |                    |       |       |       |       |
| 21 |                    |       |       |       |       |
| 22 |                    |       |       |       |       |
| 23 |                    |       |       |       |       |
| 24 |                    |       |       |       |       |
| 25 |                    |       |       |       |       |
| 26 |                    |       |       |       |       |
| 27 |                    |       |       |       |       |
| 28 |                    |       |       |       |       |
| 29 |                    |       |       |       |       |
| 30 |                    |       |       |       |       |
| 31 |                    |       |       |       |       |
| 32 |                    |       |       |       |       |
| 33 |                    |       |       |       |       |
| 34 |                    |       |       |       |       |
| 35 |                    |       |       |       |       |
| 36 |                    |       |       |       |       |
| 37 |                    |       |       |       |       |
| 38 |                    |       |       |       |       |
| 39 |                    |       |       |       |       |
| 40 |                    |       |       |       |       |
| 41 |                    |       |       |       |       |
| 42 |                    |       |       |       |       |
| 43 |                    |       |       |       |       |
| 44 |                    |       |       |       |       |
| 45 |                    |       |       |       |       |
| 46 |                    |       |       |       |       |
| 47 |                    |       |       |       |       |
| 48 |                    |       |       |       |       |
| 49 |                    |       |       |       |       |
| 50 |                    |       |       |       |       |
| 51 |                    |       |       |       |       |
| 52 |                    |       |       |       |       |
| 53 |                    |       |       |       |       |
| 54 |                    |       |       |       |       |
| 55 |                    |       |       |       |       |
| 56 |                    |       |       |       |       |
| 57 |                    |       |       |       |       |
| 58 |                    |       |       |       |       |
| 59 |                    |       |       |       |       |
| 60 |                    |       |       |       |       |
| 61 |                    |       |       |       |       |
| 62 |                    |       |       |       |       |
| 63 |                    |       |       |       |       |
| 64 |                    |       |       |       |       |
| 65 |                    |       |       |       |       |

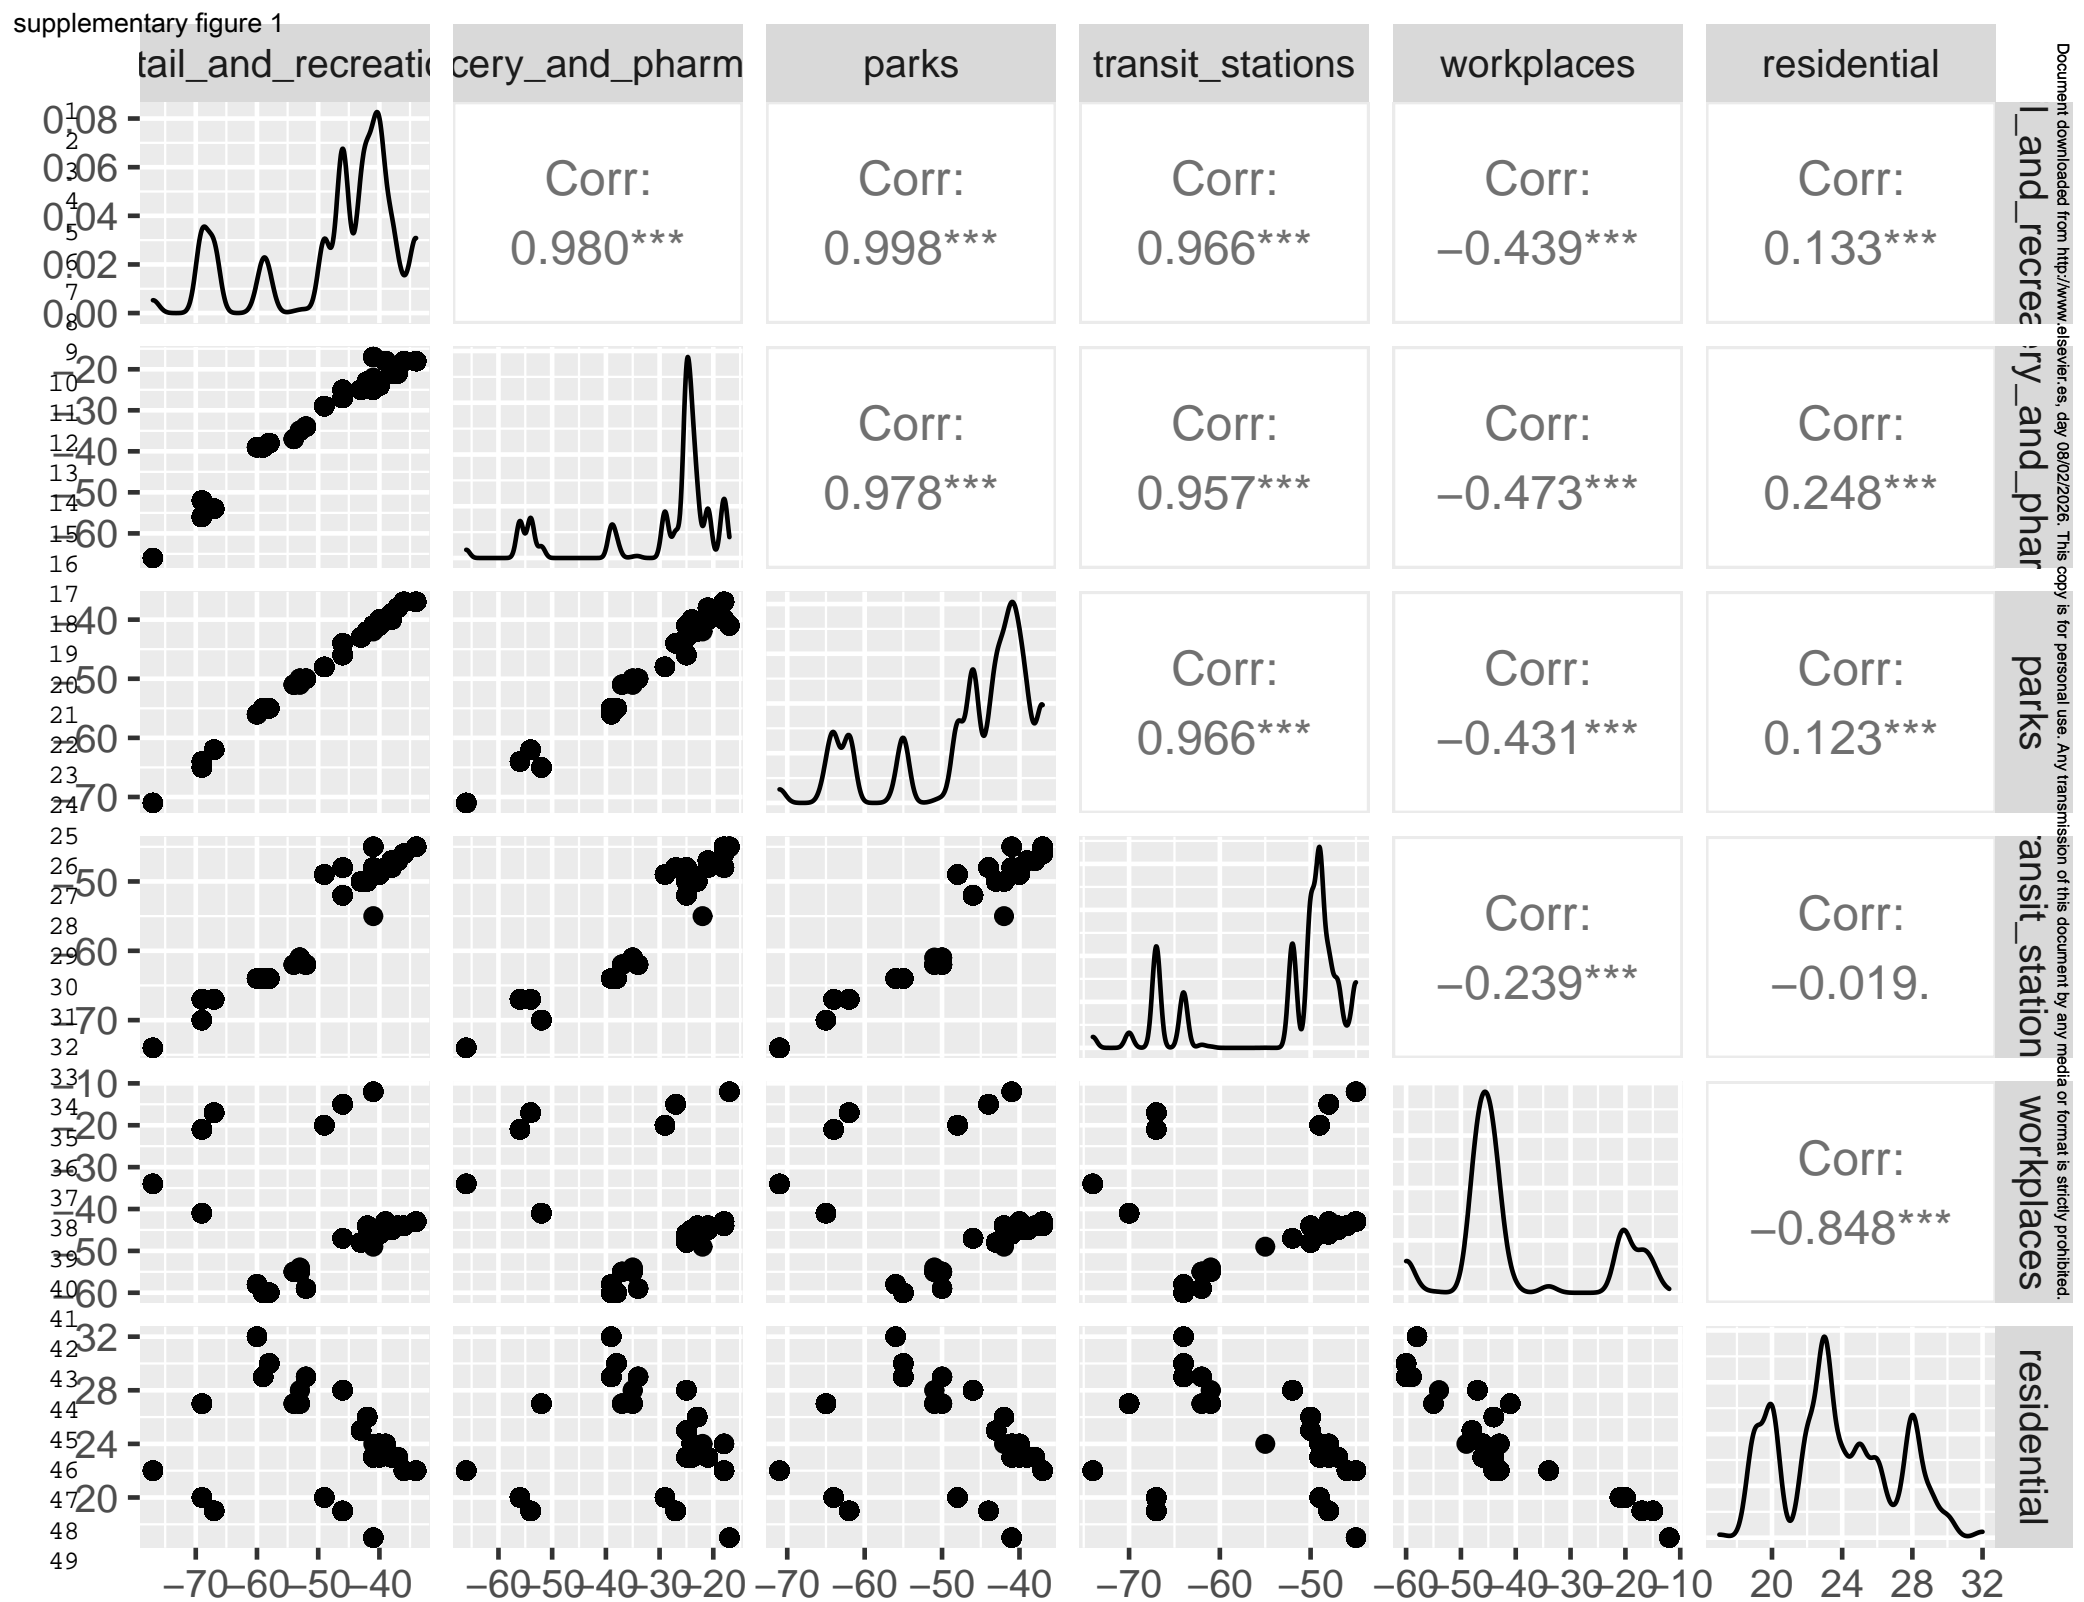

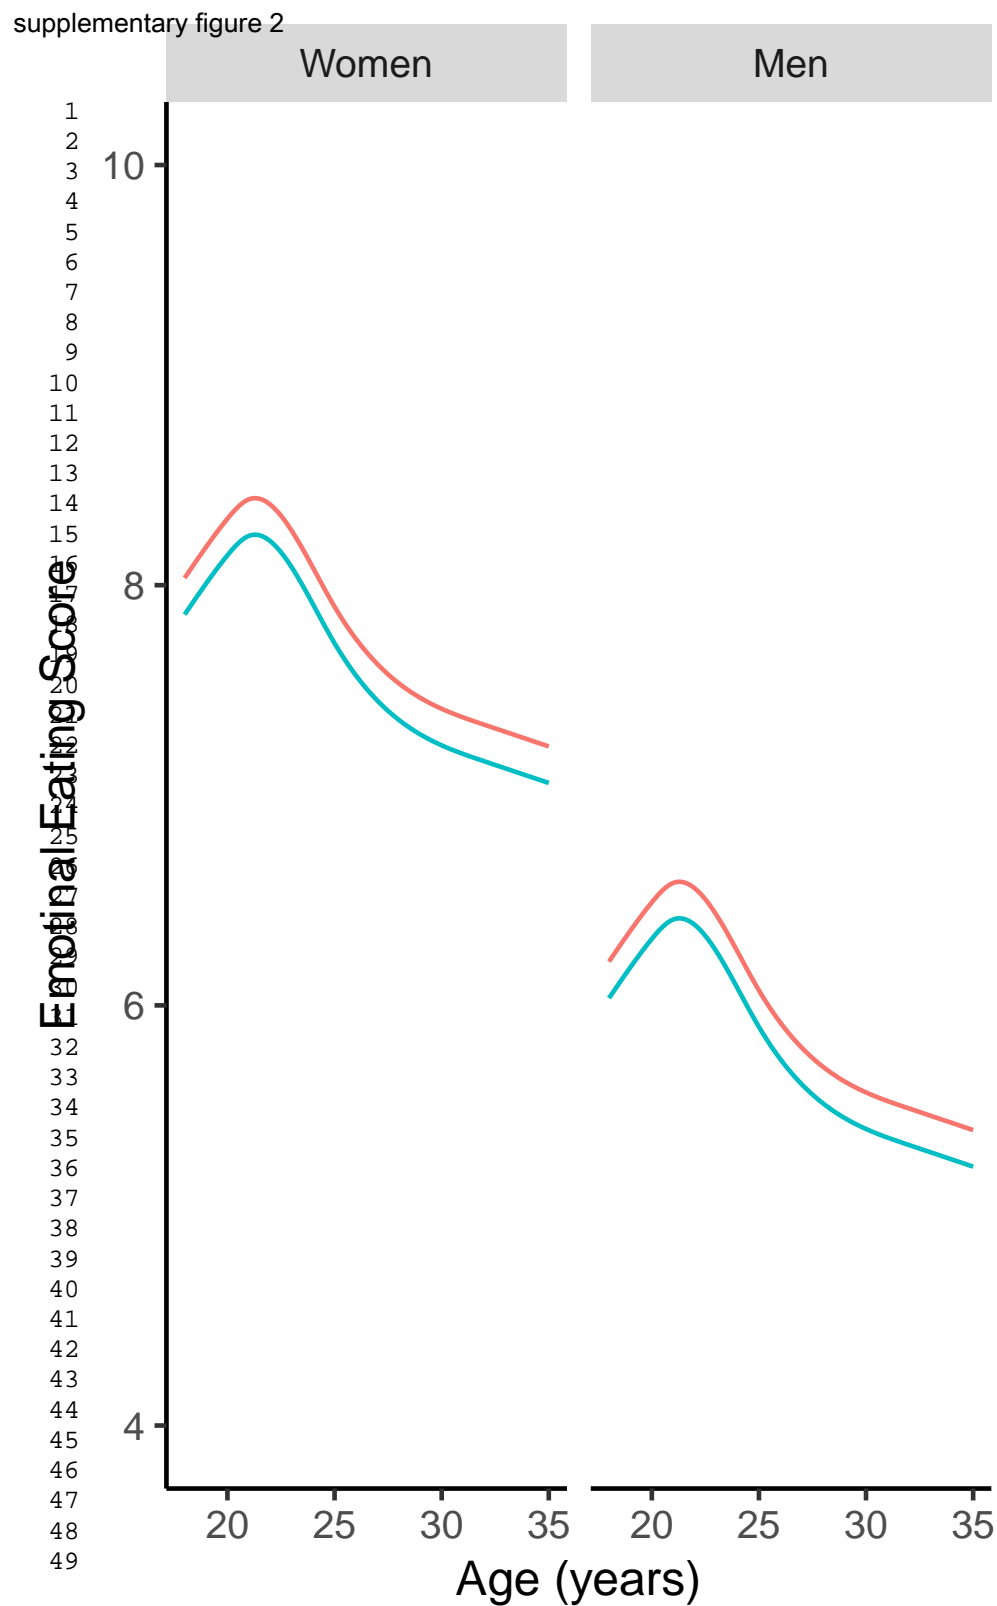

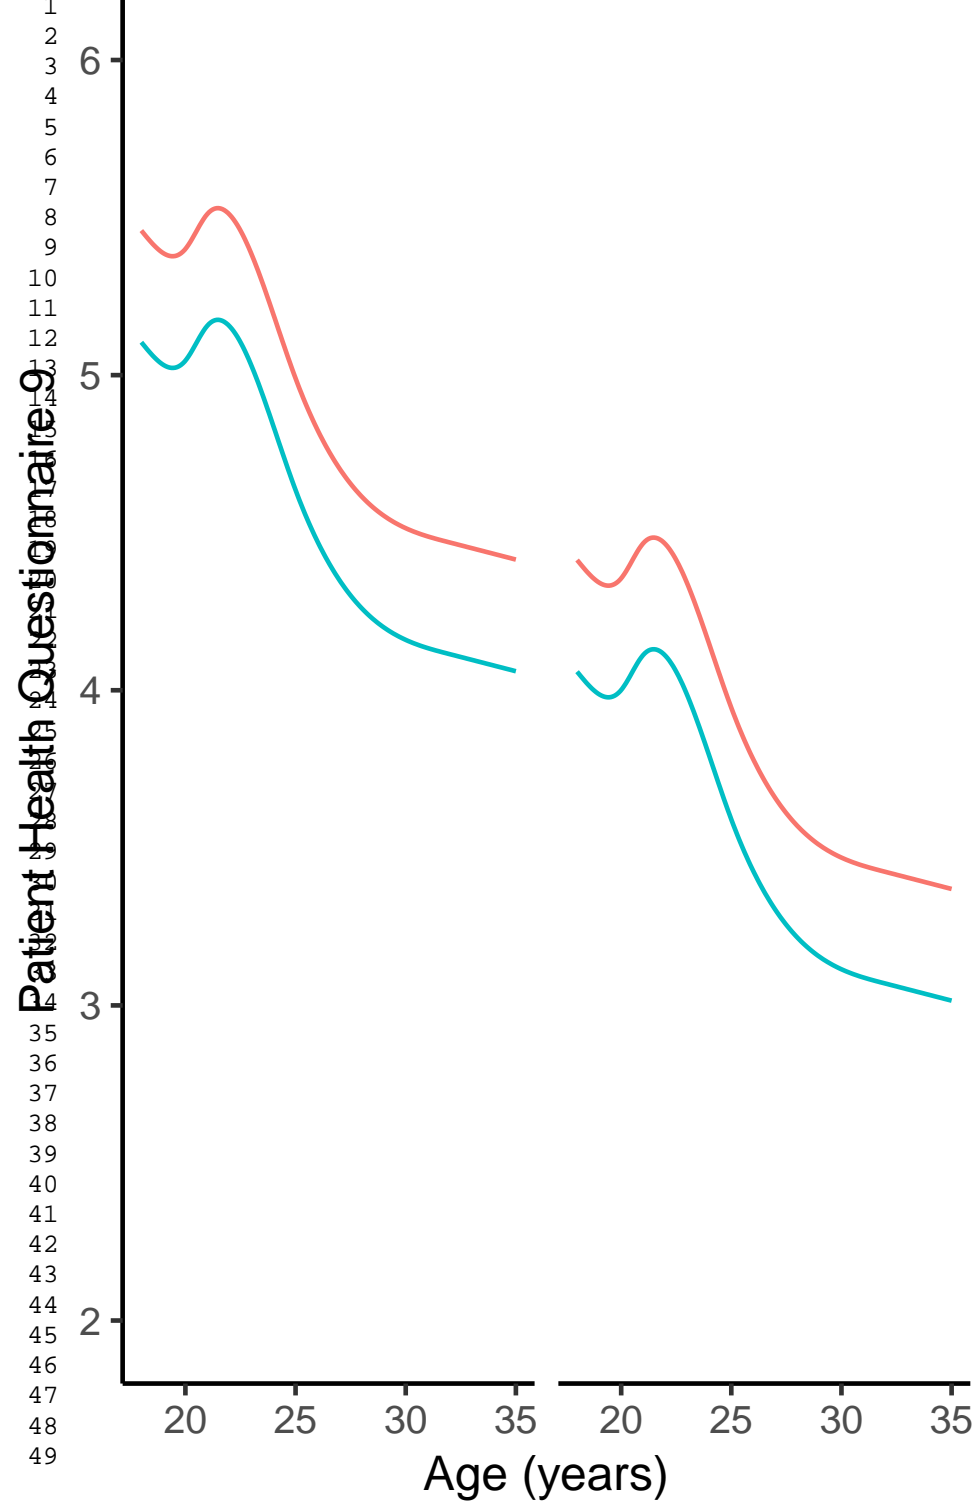

Change in mobility to groceries and pharmacies

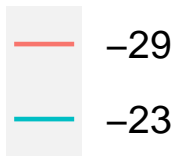

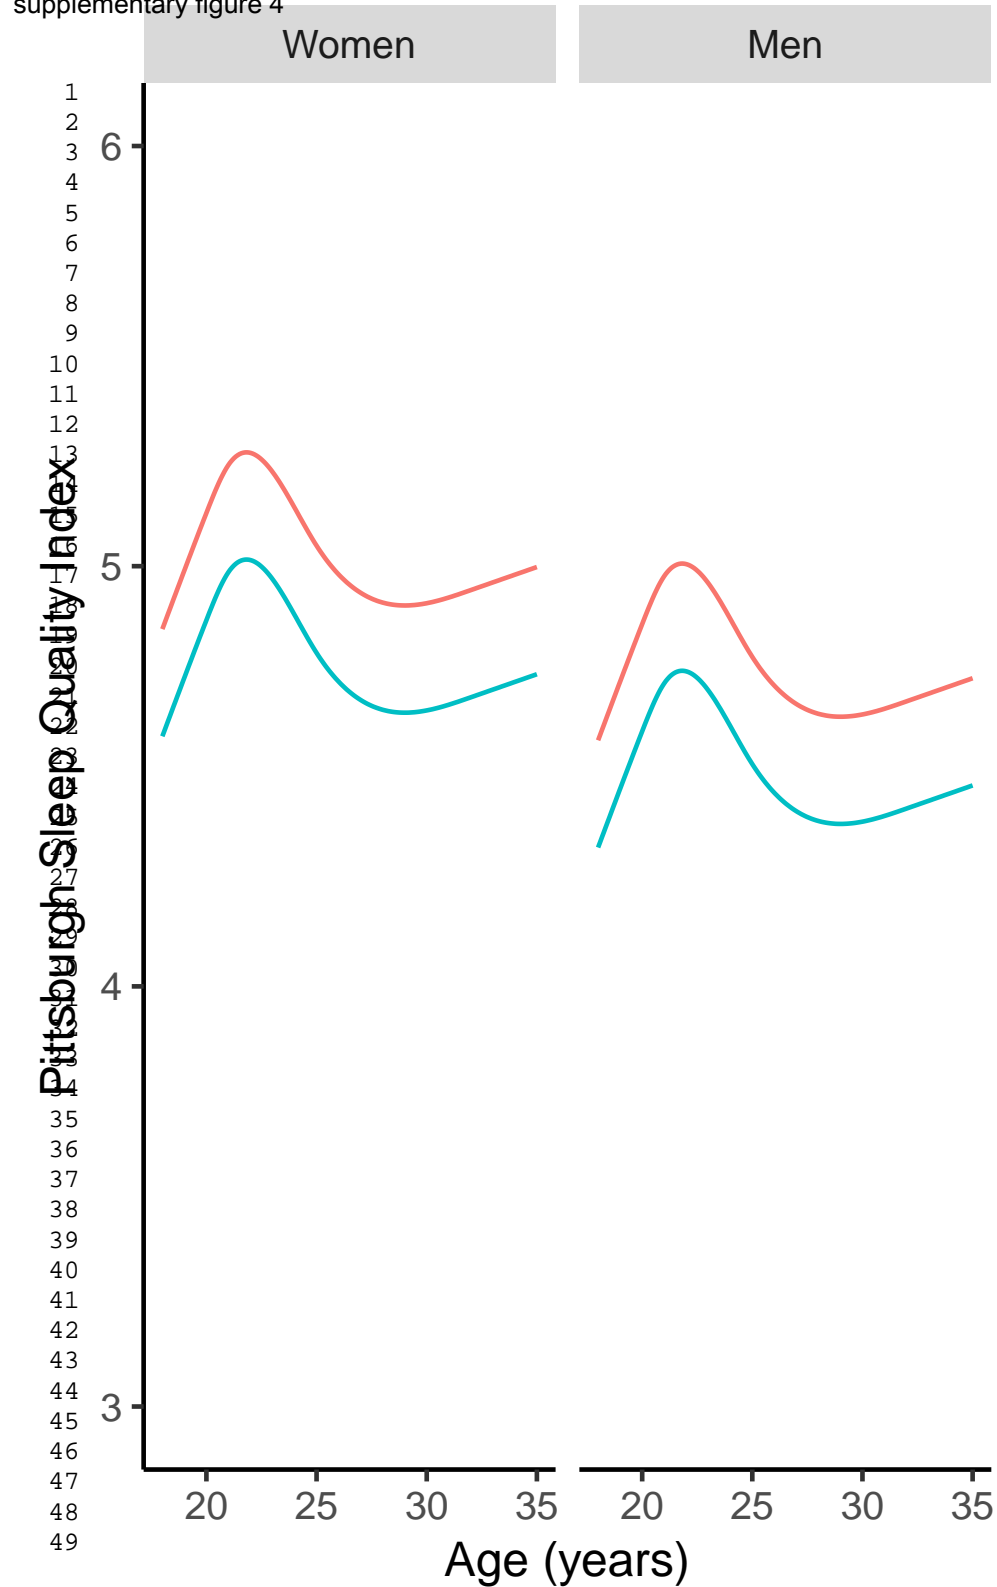

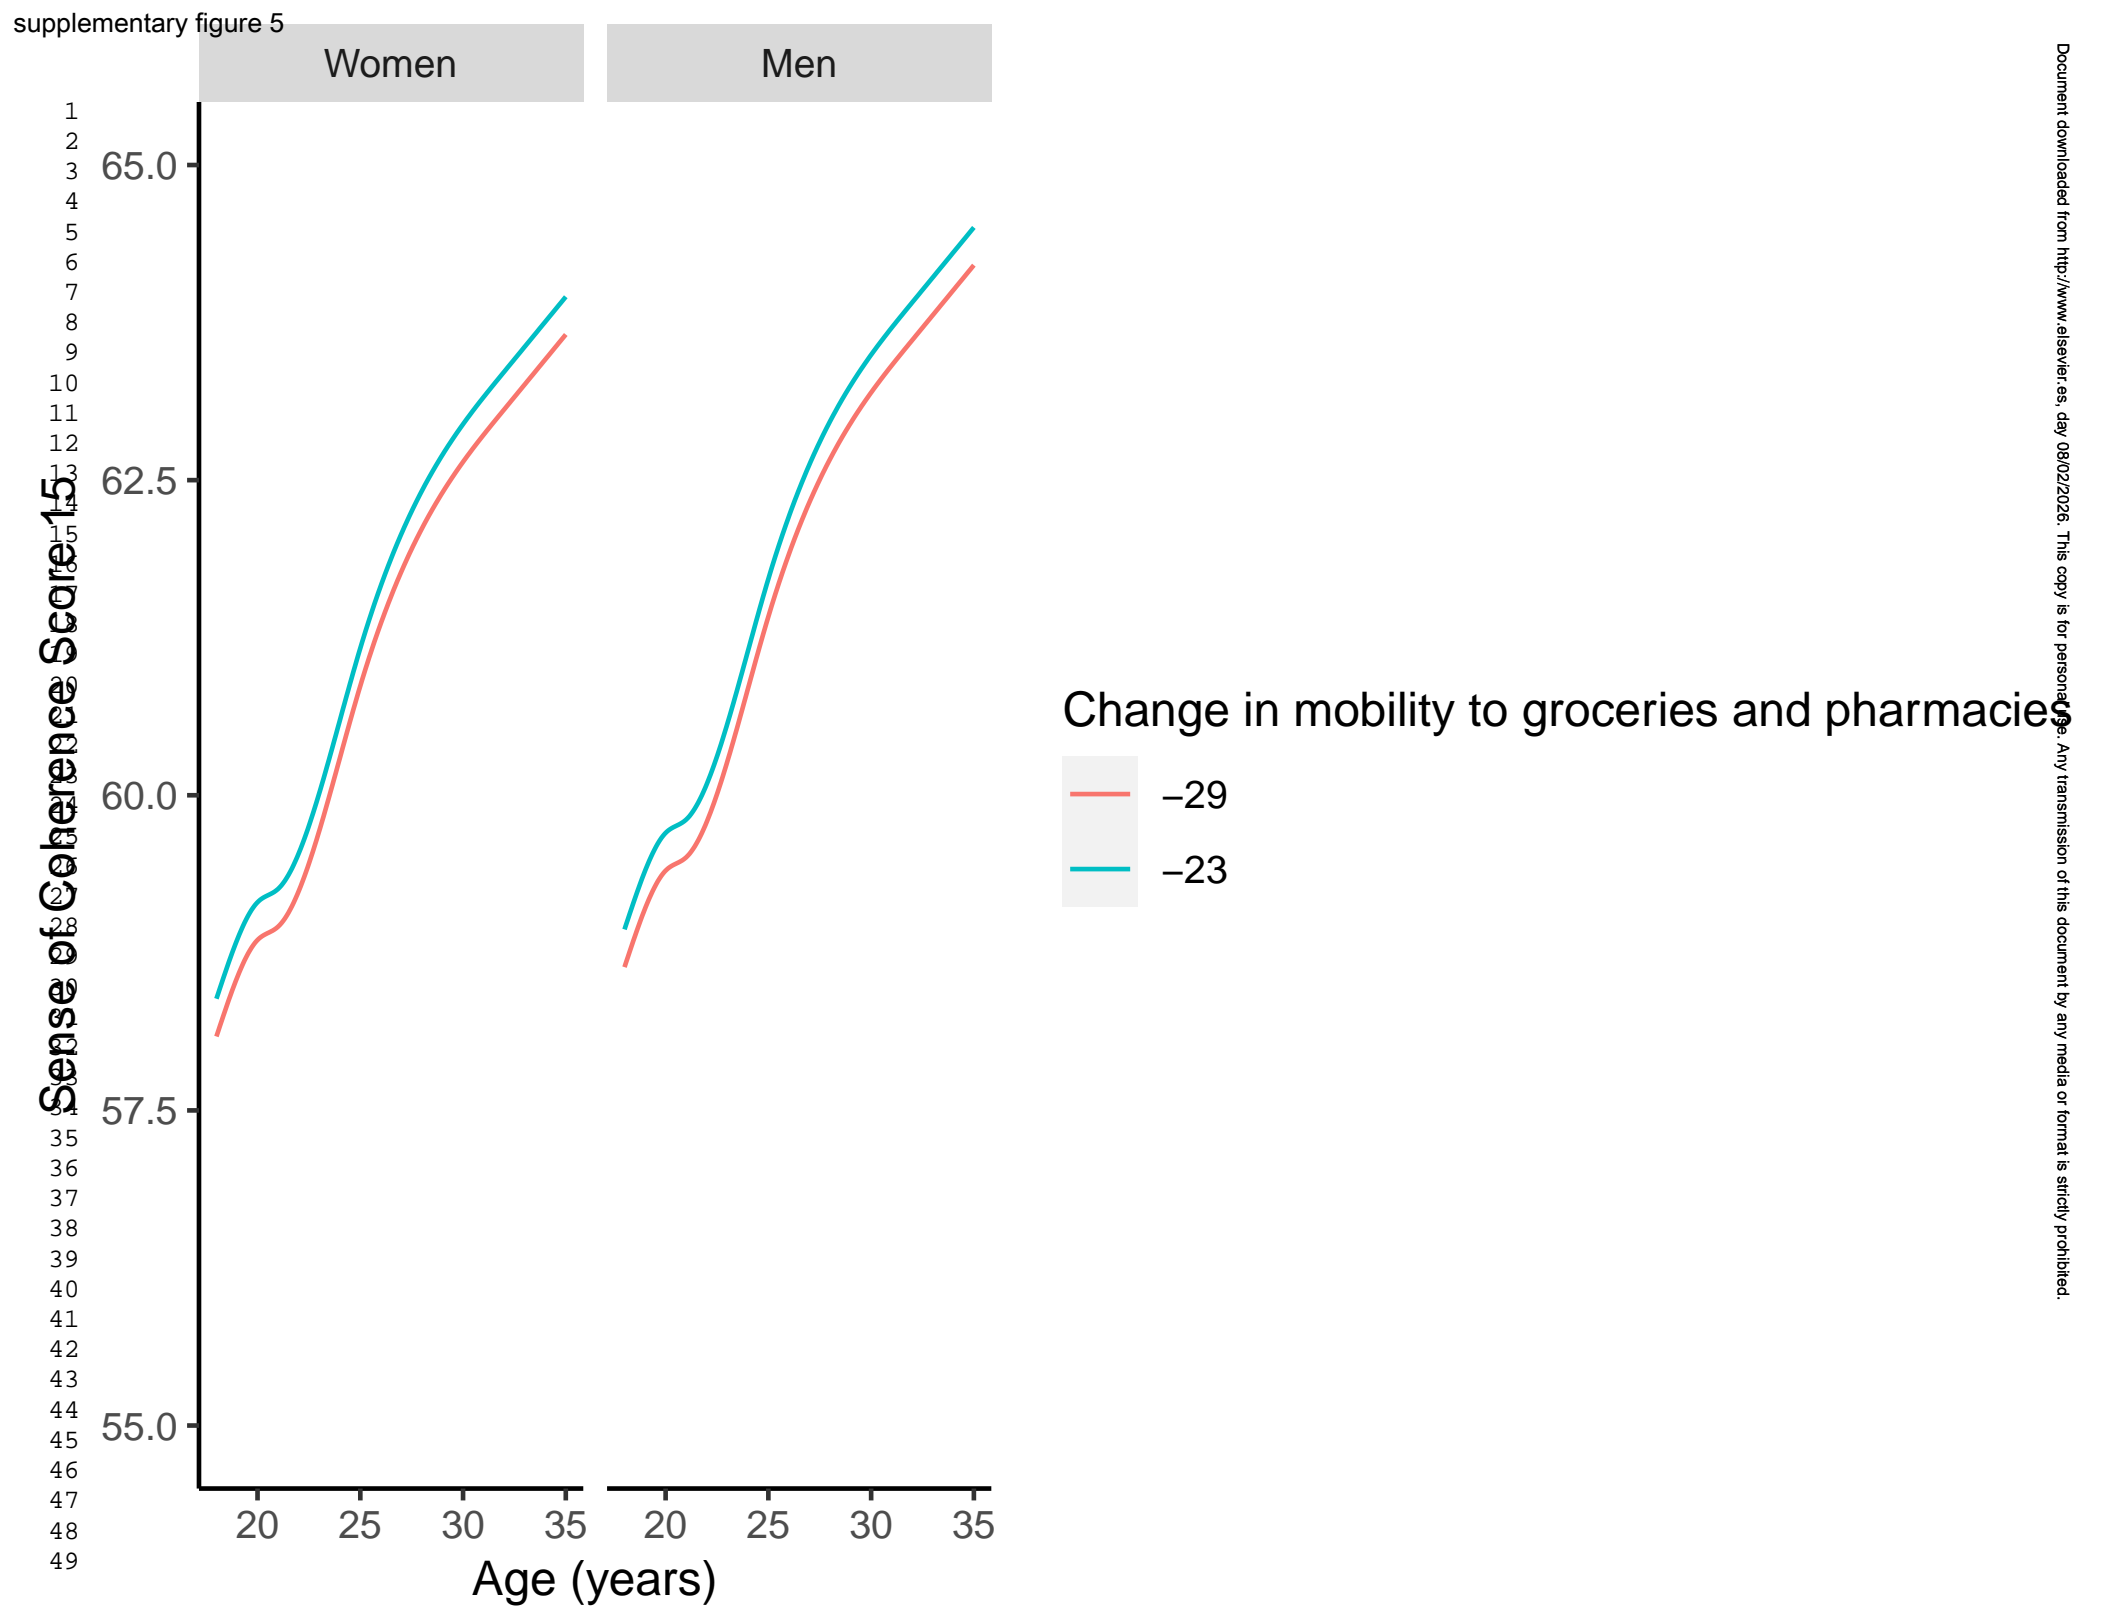

Appendix

Table I

Predicted mean values of evaluated mental health scores for main predictor. Four regression models were implemented, one for emotional eating behavior, one for depression, one for sleep quality and one for sense of coherence. Models were adjusted by residential zone (urban/rural), consumption of sleeping pills (yes/no), living with a partner (yes/no), occupation (student/employee/unemployed), times of leaving home per week (never/1-2/3 or more). For numerical predictors mean values are showed for 1<sup>st</sup> and 3<sup>rd</sup> quantiles. Model information is depicted in the last column.

|                           |                                      |       | Mean | LCI  | UCI  | Model information                           |
|---------------------------|--------------------------------------|-------|------|------|------|---------------------------------------------|
| Emotional eating behavior | Mobility to workplaces               | - 47  | 8.37 | 8.19 | 8.85 | LR Chi²: 422.31; df 14, p <0.000. R²: 0.049 |
|                           |                                      | - 34  | 7.87 | 7.61 | 8.34 |                                             |
|                           | Mobility to groceries and pharmacies | - 29  | 8.41 | 8.20 | 8.92 |                                             |
|                           |                                      | - 23  | 8.23 | 8.07 | 8.70 |                                             |
|                           | Gender                               | Woman | 8.29 | 8.13 | 8.76 |                                             |
|                           |                                      | Man   | 6.47 | 6.27 | 6.94 |                                             |
|                           | Age (years)                          | 19    | 8.07 | 7.66 | 8.76 |                                             |
|                           |                                      | 25    | 7.78 | 7.62 | 8.37 |                                             |
|                           | Mobility to workplaces               | - 47  | 5.39 | 5.10 | 6.26 |                                             |
|                           |                                      | - 34  | 4.66 | 4.21 | 5.29 |                                             |
| Depression (PHQ-9)        | Mobility to groceries and pharmacies | - 29  | 5.51 | 5.19 | 6.48 | LR Chi²: 671.24; df 14, p <0.000. R²: 0.077 |
|                           |                                      | - 23  | 5.16 | 4.90 | 5.91 |                                             |
|                           | Gender                               | Woman | 5.28 | 5.98 | 6.11 |                                             |
|                           |                                      | Man   | 4.23 | 3.94 | 5.02 |                                             |
|                           | Age (years)                          | 19    | 5.15 | 4.83 | 5.57 |                                             |
|                           |                                      | 25    | 4.75 | 4.46 | 5.16 |                                             |
|                           | Mobility to workplaces               | - 47  | 5.15 | 4.96 | 5.51 |                                             |
|                           |                                      | - 34  | 4.60 | 4.37 | 4.78 |                                             |
|                           | Mobility to groceries and pharmacies | - 29  | 5.24 | 5.04 | 5.63 | LR Chi²: 686.83; df 14, p <0.000. R²: 0.078 |
|                           |                                      | - 23  | 4.99 | 4.80 | 5.26 |                                             |
| Sleep quality (PSQI)      | Gender                               | Woman | 5.07 | 4.88 | 5.38 |                                             |
|                           |                                      |       |      |      |      |                                             |



|    |                             |     |      |      |      |                                      |
|----|-----------------------------|-----|------|------|------|--------------------------------------|
|    |                             | Man | 4.81 | 4.65 | 5.25 |                                      |
| 1  |                             |     |      |      |      |                                      |
| 2  |                             |     |      |      |      |                                      |
| 3  |                             |     |      |      |      |                                      |
| 4  |                             |     |      |      |      |                                      |
| 5  |                             |     |      |      |      |                                      |
| 6  |                             |     |      |      |      |                                      |
| 7  |                             |     |      |      |      |                                      |
| 8  |                             |     |      |      |      |                                      |
| 9  |                             |     |      |      |      |                                      |
| 10 |                             |     |      |      |      |                                      |
| 11 |                             |     |      |      |      |                                      |
| 12 |                             |     |      |      |      |                                      |
| 13 | Sense of coherence (SOC-15) |     |      |      |      | LR Chi <sup>2</sup> : 565.09; df 14, |
| 14 |                             |     |      |      |      | p <0.000. R <sup>2</sup> : 0.065     |
| 15 |                             |     |      |      |      |                                      |
| 16 |                             |     |      |      |      |                                      |
| 17 |                             |     |      |      |      |                                      |
| 18 |                             |     |      |      |      |                                      |
| 19 |                             |     |      |      |      |                                      |
| 20 |                             |     |      |      |      |                                      |
| 21 |                             |     |      |      |      |                                      |
| 22 |                             |     |      |      |      |                                      |
| 23 |                             |     |      |      |      |                                      |
| 24 |                             |     |      |      |      |                                      |
| 25 |                             |     |      |      |      |                                      |
| 26 |                             |     |      |      |      |                                      |
| 27 |                             |     |      |      |      |                                      |
| 28 |                             |     |      |      |      |                                      |
| 29 |                             |     |      |      |      |                                      |
| 30 |                             |     |      |      |      |                                      |
| 31 |                             |     |      |      |      |                                      |
| 32 |                             |     |      |      |      |                                      |
| 33 |                             |     |      |      |      |                                      |
| 34 |                             |     |      |      |      |                                      |
| 35 |                             |     |      |      |      |                                      |
| 36 |                             |     |      |      |      |                                      |
| 37 |                             |     |      |      |      |                                      |
| 38 |                             |     |      |      |      |                                      |
| 39 |                             |     |      |      |      |                                      |
| 40 |                             |     |      |      |      |                                      |
| 41 |                             |     |      |      |      |                                      |
| 42 |                             |     |      |      |      |                                      |
| 43 |                             |     |      |      |      |                                      |
| 44 |                             |     |      |      |      |                                      |
| 45 |                             |     |      |      |      |                                      |
| 46 |                             |     |      |      |      |                                      |
| 47 |                             |     |      |      |      |                                      |
| 48 |                             |     |      |      |      |                                      |
| 49 |                             |     |      |      |      |                                      |
| 50 |                             |     |      |      |      |                                      |
| 51 |                             |     |      |      |      |                                      |
| 52 |                             |     |      |      |      |                                      |
| 53 |                             |     |      |      |      |                                      |
| 54 |                             |     |      |      |      |                                      |
| 55 |                             |     |      |      |      |                                      |
| 56 |                             |     |      |      |      |                                      |
| 57 |                             |     |      |      |      |                                      |
| 58 |                             |     |      |      |      |                                      |
| 59 |                             |     |      |      |      |                                      |
| 60 |                             |     |      |      |      |                                      |
| 61 |                             |     |      |      |      |                                      |
| 62 |                             |     |      |      |      |                                      |
| 63 |                             |     |      |      |      |                                      |
| 64 |                             |     |      |      |      |                                      |
| 65 |                             |     |      |      |      |                                      |

LR: likelihood ratio test; LCI: lower confidence interval; UCI: upper confidence interval.
